1 **Cell-free multi-omics analysis reveals tumor status-in-**  
2 **formative signatures in gastrointestinal cancer patients'**  
3 **plasma**

4 Yuhuan Tao<sup>1,2,†</sup>, Shaozhen Xing<sup>1,2,†</sup>, Shuai Zuo<sup>3,†</sup>, Pengfei Bao<sup>1,2</sup>, Yunfan Jin<sup>1,2</sup>, Yu Li<sup>1,2</sup>,  
5 Yingchao Wu<sup>3</sup>, Shanwen Chen<sup>3</sup>, Xiaojuan Wang<sup>2,4</sup>, Yumin Zhu<sup>5</sup>, Ying Feng<sup>6</sup>, Xiaohua  
6 Zhang<sup>6</sup>, Xianbo Wang<sup>6</sup>, Qiaoran Xi<sup>1</sup>, Qian Lu<sup>2,4,\*</sup>, Pengyuan Wang<sup>3,\*</sup>, Zhi John Lu<sup>1,2,\*</sup>

7 <sup>1</sup>MOE Key Laboratory of Bioinformatics, Center for Synthetic and Systems Biology, School of  
8 Life Sciences, Tsinghua University, Beijing 100084, China.

9 <sup>2</sup>Institute for Precision Medicine, Tsinghua University, Beijing 100084, China.

10 <sup>3</sup>Translational Cancer Research Center, Division of General Surgery, Peking University First  
11 Hospital, Beijing 100034, China.

12 <sup>4</sup>Hepatopancreatobiliary Center, Beijing Tsinghua Changgung Hospital, Tsinghua University,  
13 No.168, Litang Road, Changping District, Beijing 102218, China.

14 <sup>5</sup>MOE Key Laboratory of Population Health Across Life Cycle, NHC Key Laboratory of Study  
15 on Abnormal Gametes and Reproductive Tract, Anhui Provincial Key Laboratory of Popula-  
16 tion Health and Aristogenics, Department of Maternal, Child and Adolescent Health, School  
17 of Public Health, Anhui Medical University, Hefei 230032, Anhui, China.

18 <sup>6</sup>Department of Integrative Medicine, Beijing Ditan Hospital, Capital Medical University, Bei-  
19 jing 100015, China.

20 <sup>†</sup>These authors contributed equally to this work.

21 \*To whom correspondence should be addressed: Zhi John Lu, Tel: +86 10 62789217, Email:  
22 zhilu@tsinghua.edu.cn. Correspondence may also be addressed: Pengyuan Wang, Tel: +86  
23 10 83575653, Email: pengyuan\_wang@bjmu.edu.cn; Qian Lu, lqa01971@btch.edu.cn.

24 **Author Contributions:** Y.T., S.X., S.Z., Z.J.L and P.W. conceived and designed the project.  
25 S.X. and P.B. performed the experiments. Y.T., P.B., Y.J., Y.L. processed the data and com-  
26 pleted the bioinformatics analyses. Sample and clinical information were curated by S.Z.,  
27 S.C., and P.W. All authors contributed to writing the manuscript.

28 **Keywords:** Multi-omics; Cell-free DNA; Cell-free RNA; Cancer diagnosis; Liquid Biopsy.

29

## 30 **Abstract**

31 During cancer development, host's tumorigenesis and immune signals are released to and  
32 informed by circulating molecules, like cell-free DNA (cfDNA) and RNA (cfRNA) in blood.  
33 However, these two kinds of molecules are still not systematically compared in gastrointesti-  
34 nal cancer. Here, we profiled 4 types of cell-free omics data from colorectal and stomach  
35 cancer patients, and assayed 15 types of genomic, epi-genomic, and transcriptomic varia-  
36 tions. First, we demonstrated that the multi-omics data were more capable of detecting can-  
37 cer genes than the single-omics data, where cfRNAs were more sensitive and informative  
38 than cfDNAs in terms of detection ratio, variation type, altered number, and enriched func-  
39 tional pathway. Moreover, we revealed several peripheral immune signatures that were sup-  
40 pressed in cancer patients and originated from specific circulating and tumor-microenviron-  
41 ment cells. Particularly, we defined a  $\gamma\delta$ -T-cell score and a cancer-associated-fibroblast  
42 (CAF) score using the cfRNA-seq data of 143 cancer patients. They were informative of clini-  
43 cal status like cancer stage, tumor size, and survival. In summary, our work reveals the cell-  
44 free multi-molecular landscape of colorectal and stomach cancer, and provides a potential  
45 monitoring utility in blood for the personalized cancer treatment.

## 46 **Introduction**

47 The extracellular nucleic acid molecules include cell-free DNA (cfDNA) and cell-free RNA  
48 (cfRNA). They are usually fragmented but not fully degraded in plasma, due to protection of  
49 extracellular vesicle (EV), or binding protein like nucleosome for cfDNA and ribonucleopro-  
50 tein (RNP) for cfRNA. These extracellular molecules have been widely used in cancer diag-  
51 nosis and prognosis, because cancer alterations of tumor cells can be detected from cfDNAs  
52 and cfRNAs in the circulating blood(1). In addition, tumor microenvironment and peripheral  
53 immune system are also crucial in characterizing a patient's status during cancer treatment.  
54 For instance, a patient's stromal cell activity and systematic immune response will affect his

55 clinical treatment outcome (e.g., immunotherapy)(2, 3). Cell-free molecules, especially cfR-  
56 NAs, contain signals released from these non-tumor cells as well(4).

57 Many cfDNA features, such as methylation, mutation, copy number, fragment pattern,  
58 and nucleosome footprint, have been utilized for noninvasive diagnosis and prognosis of dis-  
59 eases(5-7). Meanwhile, many cfRNA features can also be used as biomarkers, such as the  
60 abundance of miRNAs(8) and circRNAs(9), fragment copy and alternative splicing of mRNAs  
61 and lncRNAs(10-12). Moreover, many other RNA regulation events altered in tumor cells,  
62 such as RNA editing(13), can potentially be utilized in liquid biopsy as well.

63 In tumor cells and tissues, many studies have demonstrated that multi-omics data pro-  
64 vided a more comprehensive understanding of diseases than single-omics data(14, 15). In  
65 liquid biopsy, integrating multiple cell-free molecules also enhanced the diagnosis power. For  
66 instance, cfRNA and cfDNA were used together to detect EGFR mutation in plasma(16); 61  
67 DNA mutations and 8 proteins were combined in a multi-analyte blood test for cancer(17).  
68 However, cell-free multi-omics data of cfDNAs and cfRNAs have not been systematically in-  
69 vestigated in cancer, such as colon cancer (CRC) and stomach cancer (STAD), two of the  
70 most common types of gastrointestinal cancer. Existing methods for diagnosis and treatment  
71 monitoring of these two cancers, such as endoscopy and tissue biopsy, still lack conven-  
72 ience, sensitivity, and information of molecular mechanisms(18). Therefore, uncovering the  
73 shared and distinct cell-free signatures of these two gastrointestinal cancers will help us un-  
74 derstand their extracellular biology, and provide noninvasive monitoring utilities.

75 Here we present a systematic evaluation of cell-free multi-omics data, including methyl-  
76 ated cfDNA immunoprecipitation sequencing (cfMeDIP-seq), cfDNA whole genome sequenc-  
77 ing (cfWGS), total and small cfRNA sequencing (cfRNA-seq) data. Each group of the  
78 matched multi-omics data was sequenced from 2-3 mL plasma sample. Using colorectal  
79 cancer and stomach cancer as two example gastrointestinal cancer types, we investigated  
80 multiple alterations of cfDNAs and cfRNAs, providing a cell-free multi-molecular landscape.

81

## 82 **Results**

### 83 **Profiling cell-free multi-omics and data quality control**

84 To study cell-free multi-omics and compare them in colorectal cancer and stomach cancer,  
85 we sequenced 4-omics data for 161 individuals (Fig. 1a, see details in Methods, Extended  
86 Data Fig. 1a-c, Supplementary Table 1). The data's qualities were well controlled (see quality  
87 control steps in Methods, Supplementary Tables 2,3): intra-omics correlation between sam-  
88 ples was above 0.75 in every single omics; inter-omics correlations were mostly close to zero  
89 (Extended Data Fig. 1d); concentration, read length, and read distribution of the data were  
90 consistent with previous studies(5, 12, 19) (Extended Data Fig. 2). As expected, the se-  
91 quenced reads' distributions of cfDNAs and cfRNAs were very different: cfRNA-seq provided  
92 abundant information in exonic regions, while cfDNA-seq provided wide information in all ex-  
93 onic, intronic and intergenic regions (Fig. 1b).

94 We compared correlations between multi-omics in plasma (our data), cell lines (CCLE  
95 data(20)), and tissues (TCGA data(21)) (Fig. 1c). Different from the data in cells, signals of  
96 cfDNAs and cfRNAs were not well correlated, probably due to the heterogenous origins of  
97 cfDNAs and cfRNAs(4, 22). From another perspective, combining orthogonal information of  
98 different cell-free molecules could potentially detect cancer with better capacity than using  
99 single-omics data in plasma. Thus, we combined the multi-omics data to detect cancer  
100 genes and compared their detection capacities in the following analyses.

101

### 102 **Combination of cell-free multi-omics data enhanced the detection of cancer genes in** 103 **plasma**

104 We comprehensively profiled and calculated 15 cell-free molecular variation events using our  
105 multi-omics data (see Methods). These variations can be used to examine cancer patients  
106 and healthy donors (HDs) in a multidimensional view of individual samples (Fig. 2a) and

107 genes (Fig. 2b). For instance, *TP53* in tumors is usually depleted at DNA copy number level  
108 and downregulated at RNA expression level in cancer patients (Fig. 2b). We found that cer-  
109 tain cancer patients were not able to be simultaneously detected by both cfDNA and cfRNA  
110 at 95% specificity, suggesting that combination of cfDNA and cfRNA data would improve de-  
111 tection capacity of *TP53*. The 95% specificity was defined by variation values in healthy do-  
112 nors (HDs): an individual with a variation value (e.g., mutation ratio or abundance level)  
113 above 95% quantile of HDs was identified as an outlier.

114 We quantified the detection capacity (sensitivity) of a cancer gene as the proportion of  
115 cancer patients being detected at 95% specificity, then investigated each variation type for a  
116 set of pre-defined cancer genes. This cancer gene set was defined by referring to the COS-  
117 MIC hallmark cancer genes(23), where 38 genes with somatic mutations annotated as *colo-*  
118 *rectal* or *gastric* were used. Our data demonstrated that multiple variations' combination  
119 leads to a great increase in detection capacity, while a single alteration usually detected less  
120 than half of the patients (Fig. 2c). Alterations of 9 cancer genes, like *CUX1*, *SMAD2*, *QKI*,  
121 and *TP53*, were detected at cfDNA or cfRNA level in most patients (>75%), suggesting that  
122 these genes were frequently altered in the cancer patients. Notably, certain cfRNA variations  
123 were the major contributors, for instance, RNA alternative promoter (average ratio:17.7%),  
124 RNA expression (average ratio: 13.3%), allele specific expression (average ratio: 12.5%),  
125 and RNA splicing (average ratio: 11.4%).

126 In summary, our result demonstrated that combining cell-free multi-omics data en-  
127 hanced the detection capacity (i.e., sensitivity score at 95% specificity) for each of the pre-  
128 defined cancer genes, where cfRNA variations often contributed more to the sensitivity than  
129 cfDNA variations.

130

131 **cfRNA variations were more sensitive in cancer-related gene detection than cfDNA**  
132 **variations**

133 We further expanded the investigation from the pre-defined cancer genes to the genes al-  
134 tered in cancer patients (i.e., cancer-related genes). A gene was defined as a frequently al-  
135 tered one if found as an outlier (beyond 95% of HDs) in more than 75% of the cancer pa-  
136 tients. Consistent with the pre-defined cancer genes, the frequently altered genes were  
137 mostly identified by cfRNA variations (Fig. 2d). In other words, the cfRNA variations tend to  
138 be more sensitive than cfDNA in cancer. This finding in plasma is similar to a multi-omics  
139 study in tumor cells, which revealed that RNA variations accounted for 78.23% of all identi-  
140 fied alterations in 731 genes with significant recurrent aberrations(14).

141 We also listed 30 genes with top sensitivity (proportion of detected patients) altered at  
142 cfDNA or cfRNA level (Fig. 2e). The data further demonstrated that cfRNA variations were  
143 more sensitive than cfDNA variations: top genes altered at cfDNA level usually had lower  
144 sensitivity than those top ones at cfRNA level. Moreover, we also found that the top genes  
145 found by cfDNA and cfRNA were very different, indicating that their information was comple-  
146 mentary to each other in plasma. For instance, many top genes (e.g., *MAP3K7CL*, *DEK*,  
147 *CLEC1B*, and *SKAP2*) altered at cfRNA level are functionally related to oncogenes and im-  
148 mune pathways; among the top genes altered at cfDNA level, mitochondrial DNA (mtDNA)  
149 frequently occurred, which could be related to the increased metabolism in cancer(24).

150

### 151 **Identification of various cell-free molecules' differential alterations in cancer patients**

152 In addition to analyzing the variations altered in the individual patients, we used a statistical  
153 differential analysis to identify differentially altered variations between two groups, e.g., can-  
154 cer patients and HDs, colorectal and stomach cancer patients (see Methods, Fig. 3a).

155 Among these differential alterations, we found that cfRNA abundance, cfDNA methylation  
156 level, and cfDNA window protection score (WPS) were mostly altered in stomach cancer,  
157 while cfRNA abundance, cfRNA SNV, and cfDNA WPS were mostly altered in colorectal  
158 cancer, in terms of differential number (Fig. 3a). Many well-known cancer alterations were

159 identified from the differential analysis. For instance, we found that *KRAS*'s cfRNA  
160 abundance was significantly higher in cancer patients (*edgeR* exactTest, *P*-value = 0.011).  
161 Moreover, *KRAS*'s promoter region was also more open in cancer patients according to its  
162 cfDNA WPS (Fig. 3b). Another example is the cfDNA methylation level of *PGRMC1*, which is  
163 a carbon-monoxide-sensitive molecular switch associated with *EGFR*(25). We found that the  
164 cfDNA of *PGRMC1* was hypo-methylated at its promoter region in the cancer patients  
165 (*edgeR* exactTest, *P*-value = 0.047) (Fig. 3b).

166 We examined different alterations' capacities in cancer classification (Fig. 3c, Extended  
167 Data Fig. 3). Ratio of inter-class distance over intra-class distance was used to quantify the  
168 classification capacity for each type of differential alternations (Fig. 3d). We found that the  
169 alterations derived from the cfDNA WGS data performed well in both cancer detection (i.e.,  
170 cancer patients vs. healthy donors) and cancer type classification (i.e., colorectal vs. stom-  
171 ach cancer). The cfMeDIP-seq data worked slightly better in cancer-type classification than  
172 in cancer detection. Meanwhile, miRNA abundance derived from the small cfRNA-seq data  
173 performed not well in either case, while the alterations derived from the total cfRNA-seq data  
174 usually worked better in cancer detection than in cancer type classification. In addition,  
175 microbial cfRNA abundance derived from the total cfRNA-seq data better classified the two  
176 cancer types than the features of human cfRNAs (Fig. 3d), which is consistent with the result  
177 we previously reported(12).

178

### 179 **Suppressed immune signatures in plasma revealed by the cell-free multi-omics data**

180 We assayed the enriched pathways for the differential alterations (Fig. 3a) between cancer  
181 patients and HDs, and found that cfRNA data were relatively more informative than cfDNA  
182 data in terms of the number (Fig. 4a) and function (Fig. 4b) of the enriched pathways. In the  
183 up-regulated genes, we revealed cancer-related pathways significantly enriched in the altera-  
184 tions detected by cfDNA copy number and cfRNA abundance (*edgeR* exactTest, *P*-value <



185 0.05). In addition, we found several immune pathways (e.g., T cell and B cell receptor signal-  
186 ing pathways) enriched in the genes with down-regulated cfRNA abundance in the patients  
187 (Fig. 4b, Extended Data Fig. 4), suggesting an immunosuppression state of these pathways  
188 in the cancer patients' plasma. For instance, *CD8A*, an indicator of cytotoxic T cells, and  
189 *ZAP-70*, a critical gene in activating downstream signal transduction pathways in T cells(26),  
190 were both down-regulated in the cancer patients' plasma. *CD19*, an indicator of B cells was  
191 also found to be down-regulated in the patients. Particularly, *PD-L1*, a well-known immune  
192 suppressor in cancer, was significantly up-regulated in the colorectal cancer patients' plasma  
193 (Fig. 4c).

194 Multi-omics pathway enrichment (see Methods) also confirmed this immunosuppression,  
195 while most of the down-regulated events were found by cfRNA rather than cfDNA (Fig. 4d,  
196 Extended Data Fig. 5). For instance, among the differentially altered genes enriched in the T  
197 cell receptor signaling pathway, 28 out of the 32 genes were significantly changed with  
198 cfRNA abundance, but only 7 genes were changed with cfDNA alterations.

199 Subsequently, we validated the immunosuppression state in 710 published cell-free  
200 data, including total cfRNA and EV-enriched cfRNA data of colorectal cancer (CRC), stom-  
201 ach cancer (STAD), esophageal cancer (ESCA), hepatocellular carcinoma (HCC), Pancre-  
202 atic ductal adenocarcinoma (PDAC), and lung adenocarcinoma (LUAD) (Supplementary Ta-  
203 ble 4). We found that the T cell and B cell receptor signaling pathways were also significantly  
204 down-regulated in the plasma of these cancer patients (Fig. 4e).

205 In summary, the cell-free multi-omics data uncovered many cancer-related functional  
206 pathways and signatures in plasma. Particularly, we revealed several down-regulated im-  
207 mune signatures in the cancer patient's plasma, which were mostly contributed by cfRNAs.

208

209

210 **cfRNA features originated from specific circulating and tumor microenvironment cells**

211 In order to trace the origins of these signatures derived from cfRNAs, we sequenced total  
212 RNAs in the paired samples of plasma, primary tumor, normal tissue adjacent tumor (NAT),  
213 and peripheral blood mononuclear cells (PBMCs) from 16 colorectal cancer patients and 6  
214 healthy donors (Fig. 5a). We used a computational deconvolution method, EPIC(27), to esti-  
215 mate the origins/components of RNA-seq reads in plasma, tissue, and PBMCs. Remarkably,  
216 we found that the cfRNAs in plasma originated not only from blood cells like lymphoid and  
217 macrophages but also from tumor-microenvironment cells like endothelial cells and cancer-  
218 associated fibroblasts (CAFs). Actually, the cfRNAs in plasma captured a CAF signal that  
219 was hardly detectable by the PBMC RNAs (Fig. 5b). In summary, the data demonstrate that  
220 plasma cfRNAs contain signals not only from peripheral blood cells but from tissue cells.

221 In order to find out which type of cells were down-regulated in the cancer patients, we  
222 inferred immune cell abundance using the cfRNA-seq data based on the LM22 immune cell  
223 markers(28) (Fig. 5c). CD8 T cell abundance was substantially down-regulated in both can-  
224 cer patients' plasma (cancer patients vs. healthy donors, Wilcoxon rank sum test,  $P$ -value =  
225 0.006) and primary tumor (primary tumor vs. NAT, Wilcoxon rank sum test,  $P$ -value = 0.009).  
226 In addition, other cell types with tumor-killing potential, such as B cells and NK cells, were  
227 also down-regulated in plasma and primary tumors. Notably, these down-regulated immune  
228 signatures detected in both plasma and tumors were not well detected by the PBMCs (Fig.  
229 5c), indicating that plasma cfRNAs had the potential to better monitor cancer microenviron-  
230 ment and developing status than PBMC RNAs.

231 Furthermore, we calculated the gene expression correlation of more pathways between  
232 the paired tumor and plasma samples (Fig. 5d). Significant positive correlations between  
233 plasma and tumors were found in many pathways, such as Rap1 signaling pathway (Spear-  
234 man correlation,  $R = 0.764$ ,  $P$ -value = 0.002), mismatch repair (Spearman correlation,  $R =$   
235 0.698,  $P$ -value = 0.005), cancer-related pathway (Spearman correlation,  $R = 0.5$ ,  $P$ -

236 value=0.043), complement and coagulation cascades (Spearman correlation,  $R = 0.588$ ,  $P$ -  
237 value = 0.019), platelet activation (Spearman correlation,  $R = 0.533$ ,  $P$ -value = 0.032).

238 In summary, we have revealed positive correlations between plasma cfRNAs and tumor  
239 RNAs for certain cancer- and immune-related signatures. Plasma cfRNA's capability of trac-  
240 ing tumor signals/origins suggests its utility as a noninvasive monitor of clinical status for  
241 cancer.

242

### 243 **Signatures derived from plasma cfRNAs informed clinical status of cancer patient**

244 To prove that the signatures derived from the plasma cfRNAs are able to monitor clinical sta-  
245 tus of cancer patients, we assayed 143 total cfRNA-seq datasets from colorectal and stom-  
246 ach cancer patients, where previous data we published (GSE174302)(12) were also in-  
247 cluded. We calculated various cell type signature scores based on deconvolution of the total  
248 cfRNA-seq data (see Methods) (Fig. 6a, b). Remarkably, scores of specific cell types, such  
249 as  $\gamma\delta$  T cells, resting NK cells, M2 tumor-associated macrophages (TAM), and cancer-asso-  
250 ciated fibroblasts (CAFs), were highly correlated with the cancer stage status (Fig. 6c-f). For  
251 instance, the  $\gamma\delta$ -T-cell score was negatively correlated with cancer stage for colorectal and  
252 stomach cancer (Fig. 6a, c) and tumor size for colorectal cancer (Fig. 6g), consistent with its  
253 anti-tumor function(29, 30). In addition to the immune signatures, the cancer microenviron-  
254 ment score of CAFs was also positively correlated with the cancer stage (Fig. 6a, d). Con-  
255 sistently, when applying the plasma-derived CAF score to a TCGA cohort (1,006 colorectal  
256 and stomach cancer patients), we found that the CAF score was negatively correlated with  
257 patient's survival (Fig. 6h).

258 In summary, we have revealed specific immune (e.g.,  $\gamma\delta$  T cells) and cancer-microenvi-  
259 ronment (e.g., CAFs) signatures decomposed from plasma cfRNA-seq data, which can be  
260 used as predictive scores to monitor a patient's clinical status like cancer stage, tumor size,  
261 and survival.

262

## 263 **Discussion**

264 **Conclusion.** In this study, we present a landscape of cell-free nucleic acids for colorectal  
265 and stomach cancer based on paired data of genome, epigenome, and transcriptome in  
266 plasma. Moreover, we have demonstrated the concept of multi-omics integration in liquid bi-  
267 opsy. Subsequently, we provide a cfRNA-based utility for the monitoring of cancer status.

### 268 **Clinical significance of monitoring cancer status using noninvasive biomarkers.**

269 Conveniently monitoring a patient's status, like tumor size, cancer stage, and immune re-  
270 sponse, is very important during cancer treatment, such as immune therapy and neoadjuvant  
271 therapy(31). However, existing methods evaluating response and effectiveness of a treat-  
272 ment are still inconvenient and inaccurate(32). Liquid biopsy based on cfDNA/cfRNA bi-  
273 omarkers is a promising approach, because it is non-invasive, less painful, low cost, and  
274 convenient. The quantitative signatures/scores based on the noninvasive biomarkers would  
275 help doctors perform the best therapeutic regimen for individual patients. In addition, the  
276 gene signatures and functional pathways inferred from the sequencing data in plasma would  
277 suggest potential targets to study the mechanisms of different responses to the treatment.

278 **Functional targets revealed by the multi-omics data.** Our data have revealed many  
279 enriched pathways related to the tumor and its microenvironment (Fig. 4). For instance, one  
280 of the enriched pathways we found, focal adhesion, plays an essential role in cellular com-  
281 munication, which is also highly associated with cancer progress(33). As another example,  
282 significant down-regulation of translation pathway was revealed by our cfRNA data in the  
283 cancer patients' plasma, which was also observed in tumor-educated platelet (TEP)(34). In  
284 addition, the suppressed immune signatures in plasma are also concordant with the fraction  
285 change of active immune cells in tumors revealed by previous studies(29). Because cancer  
286 patients responded differently to immune therapy(35), these pathways and signatures need  
287 to be further examined in different cancer subtypes.

288           **Limitations of this study.** In this study, state-of-the-art technologies have enabled us  
289 to simultaneously investigate cfDNAs, cfDNAs' methylation, small and total cfRNAs in a  
290 small amount of plasma (2-3 mL). However, some conclusions could be biased by a specific  
291 technology we used. For instance, we used MeDIP because it requires less plasma (1-1.5  
292 mL) than bisulfite sequencing method (5-8 mL)(36). A bisulfite-based method like scWGBS  
293 (single cell Whole Genome Bisulfite Sequencing) would provide more precise information on  
294 DNA methylation than cfMeDIP while demanding very high sequencing depth (>30x) (37). As  
295 far as we know, this paper is one of the first studies investigating multi-omics data in liquid  
296 biopsy. However, we only focused on a few gastrointestinal cancer patients. Therefore, a  
297 comprehensive understanding of the cell-free molecules' landscape in more cancer types  
298 and subtypes is needed. A large cohort study from multiple clinical centers is necessary for a  
299 robust predicting model in the real world.

300           **Perspective of multi-omics study in liquid biopsy.** Like recent cfRNA studies(38,  
301 39), we did not enrich EVs when sequencing cfRNAs, because the total cfRNAs in plasma  
302 include not only the EV-enriched cfRNAs but also those cfRNAs outside of the EVs (e.g.,  
303 RNPs). More detailed studies of cfRNAs in different extracellular vehicles and RNPs would  
304 be useful. Moreover, the circulating system of human body is a highway for biological signal  
305 transporting by vesicle or in other forms, where cfDNA and cfRNA only represent part of the  
306 heavy traffic. Interpreting these biological processes in the circulating system requires more  
307 efforts to investigate more cell-free molecules such as proteins and lipids. Deciphering multi-  
308 ple cell-free molecules also needs many other technologies and experiments, such as  
309 cfChIP-seq(40).

## 310 **Materials and Methods**

### 311 **Cohort design, sample collection and processing**

312 We sequenced 360 cell-free omics datasets (86 cfWGS, 98 cfMeDIP-seq, 127 total cfRNA-  
313 seq, and 49 small cfRNA-seq) from 161 individuals (44 colorectal cancer patients, 36 stom-  
314 ach cancer patients, and 81 healthy donors) (Supplementary Table 1). Among them, 95 were  
315 matched in 2-omics data, 84 were matched in 3-omics data, and 42 were matched in 4-omic  
316 data (Fig. 1a). By requiring enough coverage ratio and total mapped reads (see the detailed  
317 analyzing Methods below, Supplementary Tables 2,3), we kept most datasets (352 out of  
318 360) for the downstream analyses.

319 The individuals were recruited from Peking University First Hospital (PKU, Beijing). In-  
320 formed consent was obtained for all patients. Cell-free genome (cfWGS: individual number =  
321 125), epigenome (cfMeDIP: individual number = 150), and transcriptome (total cfRNA-seq:  
322 individual number = 152; small cfRNA-seq: individual number = 73) were profiled. Patients'  
323 age was distributed between 42-87 years (median age = 64 years), and most patients (51  
324 out of 80) were diagnosed with stage I/II (Extended Data Fig. 1a). Different subtypes of colo-  
325 rectal and stomach cancer were included in the cohort (Extended Data Fig. 1b). For each  
326 person, 2-3 mL plasma sample was divided into 2-4 parts for 2 to 4-omics sequencing. For  
327 some samples (mostly from healthy donors), the plasma volumes were limited (less than 2  
328 mL). We mixed these samples from persons with the same gender and similar age, then di-  
329 vided them into 2 to 4 parts (Extended Data Fig. 1c).

330 Peripheral whole blood samples were collected using EDTA-coated vacutainer tubes be-  
331 fore any treatment of the patients. Plasma was separated within 2 hours after collection. All  
332 plasma samples were aliquoted and stored at -80°C before cfDNA and cfRNA extraction.  
333 Each sample was divided into 2-4 parts for sequencing different molecular types.

334 Peripheral blood mononuclear cells (PBMCs) were separated from whole blood by Ficoll  
335 (TBD, LTS1077-1). All PBMC samples were stored at -80°C.

336 Tissue samples were collected during surgery and transferred to liquid nitrogen within  
337 30 minutes. Normal tissue adjacent tumor (NAT) was collected at least 2 cm away from the  
338 primary tumor.

### 339 **Isolation and sequencing of cfDNA (cfWGS) and cfDNA Methylation (cfMeDIP)**

340 cfDNA was extracted from plasma using QIAamp MinElute ccfDNA Kit (Qiagen). DNA con-  
341 centration was quantified by Qubit dsDNA HS Assay kit (Thermo Fisher Scientific). Up to 5  
342 ng plasma cfDNA (~0.5 mL plasma) was used for cfWGS library with Kapa HiFi Hotstart  
343 ReadyMix (Roche) in 11-13 cycles. Libraries were sequenced on Illumina HiSeq X-ten  
344 (~60.7 million paired-end reads per library) with paired-end read length of 150 bases.

345 cfDNA methylation (cfMeDIP-seq) library was prepared following a previous protocol  
346 (41). Up to 15 ng plasma cfDNA (~1 mL plasma) were used as input, followed by end repair  
347 and A-tailing using Kapa Hyper Prep Kit (Kapa Biosystems). Next, adaptors were ligated us-  
348 ing NEBNext Multiplex Oligos index (NEB). Phage lambda DNA was added to fill the low in-  
349 put to 100 ng. After heat-denature and snap-cool, single-stranded DNA mixture was incu-  
350 bated with 5-mC antibody provided by MagMeDIP-seq Package (Diagenode), followed by  
351 14-16 cycles of library amplification, bead purification, and size selection. Libraries were se-  
352 quenced on Illumina HiSeq X-ten (~42.9 million paired-end reads per library) with paired-end  
353 read length of 150 bases.

354

### 355 **cfWGS data processing and quality control**

356 Raw fastq files were trimmed with *trim\_galore* (All software being used in this study were  
357 summarized with versions and references in Supplementary Table 5.), then aligned to  
358 hg38(42) genome with default parameters using *bwa-mem2*. Reads were further filtered by  
359 proper template length (20 bp to 1000 bp) using *samtools* and de-duplicated using *GATK*  
360 *MarkDuplicates*. Base quality was recalibrated using *GATK BaseRecalibrator*.

361 We developed a set of quality control criteria to filter out poor libraries (Supplementary  
362 Table 2). 6 quality control steps were included: 1) relH score (the relative frequency of CpGs)  
363 < 1.5; 2) saturation score (300 bp bins correlation) > 0.9; 3) genome depth > 0.2; 4) cover-  
364 age ratio > 0.1; 5) mapped ratio > 0.9; 6) unique read pairs > 2 million. Finally, 2 samples  
365 were filtered out.

### 366 **cfMeDIP-seq data processing and quality control**

367 Methylation data were trimmed by *fastp*. Clean reads were firstly subjected to lambda ge-  
368 nome alignment and then hg38(42) genome using *bowtie2* with “end-to-end” mode. Mapped  
369 reads were then de-duplicated by *GATK MarkDuplicates*. For the quality control procedure,  
370 we employed *MEDIPS* package to get CpG enrichment metrics and saturation estimation in  
371 300 bp genome-wide bins. *featureCounts* were used to assign reads to each gene.

372 In data processing, we included 6 quality control steps (Supplementary Table 2): 1)  
373 saturation score > 0.9; 2) GoGe score (the observed/expected ratio of CpGs) > 1.2; 3) relH  
374 score > 1.5; 4) coverage ratio > 0.05; 5) mapped ratio > 0.9; 6) unique read pairs > 2 million.  
375 In total, 3 samples were filtered out.

376

### 377 **Isolation and sequencing of cfRNAs (total cfRNA-seq and small cfRNA-seq)**

378 Total cfRNAs were extracted from ~1 mL of plasma using the Plasma/Serum Circulating  
379 RNA and Exosomal Purification kit (Norgen). Recombinant DNase I (TaKaRa) was used to  
380 digest DNAs. One set of ERCC RNA Spike-In Control Mixes (Ambion) was added. Next, the  
381 RNA Clean and Concentrator-5 kit (Zymo) was used to obtain pure total RNA. The total  
382 cfRNA library was prepared by SMARTer® Stranded Total RNA-Seq Kit – Pico (TaKaRa).  
383 Libraries were sequenced on Illumina HiSeq X-ten (~37.5 million paired-end reads per li-  
384 brary) with a length of 150 bases.

385 Small cfRNAs were extracted from ~1 mL of plasma using the miRNeasy Serum/Plasma  
386 Kit (Qiagen). 1ul ExiSEQ NGS Spike-in (Qiagen) was added to the extracted RNA. The small



387 cfRNA library was prepared with the QIAseq miRNA Library Kit (Qiagen). Libraries were se-  
388 quenced on Illumina HiSeq X-ten (~40.1 million reads per library), where adaptors linked to  
389 the short reads were later removed.

390

### 391 **Total cfRNA-seq data processing and quality control**

392 For total cfRNA-seq data, adaptors and low-quality sequences were trimmed using *cutadapt*.  
393 Reads shorter than 16 nt were discarded. For template-switch-based RNA-seq data, GC oli-  
394 gos introduced in reverse transcription were trimmed off, after which reads shorter than 30 nt  
395 were discarded. The remaining reads were mapped to ERCC's spike-in sequences, NCBI's  
396 UniVec sequences (vector contamination), and human rRNA sequences sequentially using  
397 *STAR*. Then, all reads unmapped in previous steps were mapped to the hg38(42) genome  
398 index built with the GENCODE(43) v27 annotation. Reads unaligned to hg38 were aligned to  
399 circRNA junctions(44). For circRNA, only fragments spanning back-splicing junctions were  
400 taken into consideration. Duplicates in the aligned reads were removed using *GATK Mark-*  
401 *Duplicates*. To avoid the impact of potential DNA contamination, only intron-spanning reads  
402 were considered for gene expression quantification(34). Intron-spanning reads were defined  
403 as a read pair with a CIGAR string in which at least one mate contains 'N' in the BAM files.  
404 Reads on exons were counted and aggregated to gene by *featureCounts*.

405 We filtered total cfRNA-seq samples using multiple quality control steps (Supplementary  
406 Table 3): 1) raw read pairs > 10 million; 2) clean read pairs (reads remained after trimming  
407 low quality and adaptor sequences) > 5 million; 3) aligned read pairs after duplicate removal  
408 (aligned to the hg38(42) human genome, and circRNA junctions) > 0.5 million; 4) fraction of  
409 spike-in read pairs < 0.5; 5) ratio of rRNA read pairs < 0.55; 6) ratio of mRNA and lncRNA  
410 read pairs > 0.2; 7) ratio of unclassified read pairs < 0.6; 8) number of intron-spanning read  
411 pairs > 100,000, 9) exonic/intronic reads ratio > 1. In total, 3 samples were filtered out.

412

### 413 **Small cfRNA-seq data processing and quality control**

414 For small cfRNA-seq data, reads quality lower than 30 or length less than 15 were filtered by  
415 *trim\_galore*. The remaining reads were sequentially mapped to ExiSEQ NGS Spike-in (a mix  
416 of 52 synthetic 5' phosphorylated microRNAs), NCBI's UniVec sequences, and human rRNA  
417 sequences, miRNA recorded in miRBase(45), lncRNA, mRNA, piRNA, snoRNA, snRNA,  
418 srpRNA, tRNA, transcripts of unknown potential (TUCPs) annotated in MiTranscriptome(46),  
419 Y\_RNA by *bowtie2*. Mapped reads were sorted and indexed by *samtools*. Duplicates were  
420 removed by *umi\_tools*.

421 We filtered small cfRNA-seq samples using 2 quality control steps (Supplementary Ta-  
422 ble 3): (1) datasets are required to have at least 100,000 reads that overlap with any anno-  
423 tated RNA transcript in the host genome, and (2) over 50% of the reads that map to the host  
424 genome also align to any RNA annotation. All small cfRNA-seq samples have enough reads  
425 for quantification, and most of the reads are aligned to RNA.

426

### 427 **Isolation and sequencing of RNAs in tissue cells and PBMCs**

428 Tissue RNA was extracted by Trizol. The tissue RNA library was prepared with the NEBNext  
429 Ultra™ II RNA Library Prep Kit for Illumina. PBMC was separated by Ficoll from whole blood.  
430 The PBMC RNA library was prepared by SMARTer® Stranded Total RNA-Seq Kit – Pico  
431 (TaKaRa). All libraries were sequenced on Illumina HiSeq X-ten (~38.8 million per library)  
432 with paired-end read length of 150 bases, where adaptors being sequenced were later re-  
433 moved.

### 434 **Genome annotations**

435 Human gene-centric genome regions and RNA biotypes were extracted from GENCODE v27  
436 gtf file using *bedtools*. Human genome blacklist regions(47) were downloaded from EN-  
437 CODE (<https://www.encodeproject.org/>). CpG island regions were downloaded from UCSC  
438 genome browser (<http://genome.ucsc.edu/>). CpG shore and shelf were defined as 2 kb and 4

439 kb flank regions, respectively. Repeated regions were downloaded from RepeatMasker  
440 (rmsk) database in UCSC genome browser. Promoter regions were defined as -2000 bp to  
441 +500 bp relative to TSS, according to a recent study(48).

442

#### 443 **cfDNA and cfRNA length estimation**

444 The length of cfDNA was summarized using BAM metric “TLEN” (Extended Data Fig. 2b).  
445 Insert length of total cfRNA-seq (Extended Data Fig. 2h) was estimated by MISO, using long  
446 constitutive exons as references.

447

#### 448 **Correlation calculation among samples and omics**

449 For correlation among samples, experiment reproducibility was checked using high through-  
450 put data correlation. Sample-based (i.e., sample A correlated with B by all genes abun-  
451 dances) Pearson correlations and corresponding *P*-values were calculated by *rcorr* function  
452 in R package *Hmisc*. Inter- or inner-omics correlations among different cancer types were av-  
453 eraged from multiple samples.

454 For gene correlation among omics, gene-based correlations (e.g., a gene’s DNA copy  
455 number and its RNA expression in the matched samples) were calculated. To compare om-  
456 ics correlation in cell lines and tissues, we downloaded RNA expression, DNA copy number,  
457 and DNA methylation data from the Cancer Cell Line Encyclopedia (CCLE)(20) and the Can-  
458 cer Genome Atlas (TCGA)(21) from UCSC Xena (<https://gdc.xenahubs.net/>) and the Cancer  
459 Dependency Map portal (<https://depmap.org/>), respectively. Matched 3-omics data (33 stom-  
460 ach and 49 large intestine cell lines; 337 STAD, 307 COAD tissues) were selected for further  
461 analysis. For TCGA data, the gene-level copy number data were calculated by taking the  
462 segmental mean of the corresponding gene; the DNA methylation data were analyzed by  
463 calculating the CpG average beta value in the promoter region (2000 bp upstream and 500

464 bp downstream of TSS) of each gene; the gene expression data were converted to TPM  
465 (transcripts per million) data. Genes with NAs were removed.

466

#### 467 **Calculation of multiple cfDNA variations**

468 DNA copy number, window protection score (WPS), end-motif frequency, and fragment size  
469 were calculated based on the cfDNA-seq data. And DNA methylation of the promoter and  
470 CpG island was calculated based on cfMeDIP-seq data.

471 DNA copy number: Copy number was calculated as a gene-centric CPM (counts per  
472 million mapped regions) using cfWGS data, where hg38 blacklist regions(47) were masked.  
473 It was standardized as z-score using HDs' distribution.

474 WPS: Windowed protection score (WPS) was calculated as the originally described  
475 study with minor modifications to estimate nucleosome occupancy in cfDNA(49). In brief, we  
476 used similar parameters as previously described: a minimum fragment size of 120 bp, a  
477 maximum fragment size of 180 bp, and a window of 120 bp. To account for variations in se-  
478 quencing depth between samples, we performed a normalization step by dividing the WPS  
479 by the mean depth of randomly selected 1000 background sites in the genome. And then, for  
480 each gene, we quantify the nucleosome occupancy in TSS by computing the mean WPS  
481 from -150bp to +50bp around TSS.

482 End-motif frequency: End-motif was calculated following Jiang et al.(50). In short, the  
483 occurrence of all 5' end 4-mer sequences (256 in total) of each valid template were counted  
484 and normalized as a ratio for each sample. Shannon entropy was calculated from the fre-  
485 quency of motif as motif diversity score (MDS) for each sample (theoretical scale: [0,1]).

486 Fragment size: The fragment size ratio matrix was calculated following Cristiano et  
487 al.(51). In short, 100-150 bp and 151-220 bp cfDNA templates were defined as short and  
488 long fragments respectively, 504 filtered bins mentioned in the original paper were converted

489 to 469 bins in GRCh38 genome version, the read counts of each fragments type were also  
490 adjusted by LOESS-based GC content correction model.

491 DNA methylation: For each sample, raw counts of cfMeDIP-seq in promoter regions  
492 were normalized to CPM for cfDNA methylation level. We also computed counts per 300bp  
493 non-overlapping windows, normalized to CPM, and reduced to windows encompassing CpG  
494 islands, shores, and shelves.

495

#### 496 **Calculation of multiple cfRNA variations**

497 All the RNA variations, except for miRNA abundance, were calculated based on the total  
498 cfRNA-seq data.

499 RNA expression/cfRNA abundance: raw counts of miRNAs were normalized to CPM us-  
500 ing small cfRNA-seq data; raw counts of the other genes were normalized to TPM using total  
501 cfRNA-seq data.

502 cfRNA alternative promoter: transcript isoform abundance was quantified by *salmon* and  
503 normalized to TPM. TPMs of isoforms with transcript start sites within 10 bp (sharing the  
504 same promoter) were aggregated as one promoter activity. TPM < 1 promoter is defined as  
505 an inactive promoter. The promoter with the highest relative promoter activity is defined as  
506 the major promoter. The remaining promoters are defined as minor promoters (52).

507 cfRNA SNV: intron-spanning reads were split by *GATK SplitNCigarReads* for confident  
508 SNP calling at RNA level. Then, alterations were identified by *GATK HaplotypeCaller* and fil-  
509 tered by *GATK VariantFilteration* with the following 4 criteria: strand bias defined by fisher  
510 exact test phred-scaled  $P$ -value (FS) < 20, variant confidence (QUAL) divided by the unfil-  
511 tered depth (QD) > 2, total number of reads at the variant site (DP) > 10, SNP quality  
512 (QUAL) > 20. Allele fraction was defined as allele count divided by total count (reference  
513 count and allele count).

514 cfRNA editing: *GATK ASEReadCounter* was used to identify editing sites based on  
515 REDportal(53). The editing ratio was defined as allele count divided by total count.

516 cfRNA allele specific expression: *GATK ASEReadCounter* were used to identify allele  
517 specific expression gene site based on SNP sites. For each individual, Allelic expression  
518 (AE,  $AE = |0.5 - \text{Reference ratio}|$ ,  $\text{Reference ratio} = \text{Reference reads}/\text{Total reads}$ ) was cal-  
519 culated for all sites with  $\geq 16$  reads(54).

520 cfRNA splicing: The percent spliced-in (PSI) score of each alternative splicing event was  
521 calculated using *rMATS-turbo*.

522 Chimeric cfRNA: Reads unaligned to genome were remapped to chimeric junctions by  
523 *STAR-fusion* to identify chimeric RNA. Chimera references were based on GTex(55) and  
524 ChimerDB-v3(56).

525 Microbial cfRNA abundance: Reads unaligned to genome were classified using *kraken2*  
526 with its standard database to identify microbial cfRNA at genus level. Potential contamina-  
527 tions were filtered according to previous study(12). Counts at the genus level were also nor-  
528 malized by total genera counts.

529

### 530 **Calculation of differential alteration between cancer and healthy control**

531 cfDNA copy number, promoter methylation, and CpG island methylation: *exactTest* imple-  
532 mented in *edgeR* were used between cancer patients and HDs.  $|\log_2FC| > 0.59$  and *P*-value  
533  $< 0.05$  was used as the cutoff for defining significant differential alteration.

534 cfDNA end motif and fragment size: each differentially used motif or differential size  
535 fragment were identified by the Wilcoxon rank sum test for relatively end motif usage or frag-  
536 ment size. *P*-value  $< 0.05$  was used as the cutoff.

537 cfDNA window protection score: each differentially protected gene was identified by  
538 the Wilcoxon rank sum test for window protection score.  $|\text{delta window protection score}| >$   
539  $0.5$ , and *P*-value  $< 0.05$  was used as cutoff.

540 RNA expression/cfRNA abundance and cf-miRNA abundance: differentially expressed  
541 genes were identified using the exactTest method in *edgeR*.  $|\log_2FC| > 0.59$  and  $P$ -value  $<$   
542  $0.05$  was used as cutoff.

543 cfRNA alternative promoter usage, editing, and SNV: each differentially used promoter  
544 or the differentially mutated allelic site or editing site was defined by the Wilcoxon rank sum  
545 test for promoter usage or allele fraction.  $|\text{delta allele fraction}| > 0.2$  and  $P$ -value  $< 0.05$  was  
546 used as cutoff.

547 cfRNA allele specific expression: each differentially expressed allelic site was defined by  
548 the Wilcoxon rank sum test for AE.  $|\text{delta AE}| > 0.1$  and  $P$ -value  $< 0.05$  was used as cutoff.

549 cfRNA splicing: differential splicing events were identified by the likelihood ratio test im-  
550 plemented in *rMATs*.  $|\text{delta PSI}| \geq 0.05$  and  $P$ -value  $< 0.05$  was used as cutoff.

551 Chimeric cfRNA: differential chimeric RNA events were defined by the fisher exact test  
552 between cancer patients and healthy donors.  $|\text{delta frequency}| > 0.1$  and  $P$ -value  $< 0.05$  was  
553 used as cutoff.

554 Microbial cfRNA abundance: each differential genus abundance was defined by the Wil-  
555 coxon rank sum test.  $|\text{delta AE}| > 0.1$  and  $P$ -value  $< 0.05$  was used as cutoff.

556

### 557 **Pathway enrichment analysis**

558 For the above differential alterations, up-regulated and down-regulated genes in cancer were  
559 annotated by Kyoto Encyclopedia of Genes and Genomes (KEGG)(57). For cfRNA SNP, al-  
560 lele specific expression, and editing, the dysregulated sites' coordinates were assigned to  
561 the gene using an R package, *biomaRt*. KEGG enrichment was calculated using *clusterPro-*  
562 *filer*.

### 563 **Integrative pathway analysis of multi-omics**

564 Integrative pathway analysis of multi-omics data (i.e., RNA expression, CNA, DNA methylation) was performed using *ActivePathways*(58). *P*-values were corrected for multiple testing using the Holm procedure, and 0.05 was set as the cutoff value for significance. And then, the enrichment map was visualized using the plugin *enhancedGraphics* in *Cytoscape*(59).

568

### 569 **Cell type signature score calculation**

570 Cell type signature scores were deconvoluted from the plasma/tissue total RNA-seq data, using CIBERSORTx(60) with 1000 permutations. CIBERSORTx uses a reference panel of signature genes of different cell types and implements a support vector regression model to estimate the compositions of a mixture of different cell types' RNAs. We used panels of tumor microenvironment (TME) cells(61) and LM22 panels of immune cells(28). We also used TIDE(62) and EPIC(27) methods to calculate scores of TME cells. The input to CIBERSORTx, TIDE, and EPIC is the TPM read count matrix of cfRNA abundance. When calculating the score of EPIC:CAFs for the TCGA cohort, the CAF gene list was re-defined using our cfRNA-seq data (significantly correlated with the stage), and the input gene abundance values were derived from the tissue RNA-seq data of TCGA.

580

### 581 **Software**

582 All software being used in this study was summarized with versions and references in Supplementary Table 5.

583



## 584 **Acknowledgments**

585 This work is supported by Tsinghua University Spring Breeze Fund (2021Z99CFY022), Na-  
586 tional Natural Science Foundation of China (81972798, 32170671, 81902384), National Key  
587 Research and Development Plan of China (2019YFC1315700), National Science and Tech-  
588 nology Major Project of China (2018ZX10723204, 2018ZX10302205), Tsinghua University  
589 Guoqiang Institute Grant (2021GQG1020), Tsinghua University Initiative Scientific Research  
590 Program of Precision Medicine (2022ZLA003), Bioinformatics Platform of National Center for  
591 Protein Sciences (Beijing) (2021-NCPSB-005). This study was also supported by Beijing Ad-  
592 vanced Innovation Center for Structural Biology, Bio-Computing Platform of Tsinghua Univer-  
593 sity Branch of China National Center for Protein Sciences, Interdisciplinary Clinical Research  
594 Project of Peking University First Hospital and the Capital Health Research and Develop-  
595 ment of Special, Open Research Fund Program of Beijing National Research Center for In-  
596 formation Science and Technology.

597 *Funding for open access charge: Tsinghua University Spring Breeze Fund*  
598 *[2021Z99CFY022].*

## 599 **Ethics approval and consent to participate**

600 This study was approved by the institutional review board of Peking University First Hospital  
601 (2018-15). Informed consent was obtained from all patients.

## 602 **Consent for publication**

603 All authors have approved the manuscript and agree with the publication.

## 604 **References**

- 605 1. E. Heitzer, I. S. Haque, C. E. S. Roberts, M. R. Speicher, Current and future  
606 perspectives of liquid biopsies in genomics-driven oncology. *Nature Reviews Genetics*  
607 **20**, 71-88 (2019).
- 608 2. K. J. Hiam-Galvez, B. M. Allen, M. H. Spitzer, Systemic immunity in cancer. *Nature*  
609 *Reviews Cancer* **21**, 345-359 (2021).
- 610 3. R. L. Barrett, E. Puré, Cancer-associated fibroblasts and their influence on tumor  
611 immunity and immunotherapy. *eLife* **9**, e57243 (2020).
- 612 4. S. K. Vorperian *et al.*, Cell types of origin of the cell-free transcriptome. *Nature*  
613 *Biotechnology* **40**, 855-861 (2022).
- 614 5. Y. van der Pol, F. Mouliere, Toward the Early Detection of Cancer by Decoding the  
615 Epigenetic and Environmental Fingerprints of Cell-Free DNA. *Cancer Cell* **36**, 350-368  
616 (2019).
- 617 6. A. Jamshidi *et al.*, Evaluation of cell-free DNA approaches for multi-cancer early  
618 detection. *Cancer Cell* **40**, 1537-1549.e1512 (2022).
- 619 7. S. Y. Shen *et al.*, Sensitive tumour detection and classification using plasma cell-free  
620 DNA methylomes. *Nature* **563**, 579-583 (2018).
- 621 8. J. Zhou *et al.*, Plasma MicroRNA Panel to Diagnose Hepatitis B Virus-Related  
622 Hepatocellular Carcinoma. *Journal of Clinical Oncology* **29**, 4781-4788 (2011).
- 623 9. S. Wang *et al.*, Circular RNAs in body fluids as cancer biomarkers: the new frontier of  
624 liquid biopsies. *Molecular Cancer* **20**, 13 (2021).
- 625 10. Y. Zhu *et al.*, Integrative analysis of long extracellular RNAs reveals a detection panel  
626 of noncoding RNAs for liver cancer. *Theranostics* **11**, 181-193 (2021).
- 627 11. M. H. Larson *et al.*, A comprehensive characterization of the cell-free transcriptome  
628 reveals tissue- and subtype-specific biomarkers for cancer detection. *Nature*  
629 *Communications* **12**, 2357 (2021).

- 630 12. S. Chen *et al.*, Cancer type classification using plasma cell-free RNAs derived from  
631 human and microbes. *eLife* **11**, e75181 (2022).
- 632 13. S. Ben-Aroya, E. Y. Levanon, A-to-I RNA Editing: An Overlooked Source of Cancer  
633 Mutations. *Cancer Cell* **33**, 789-790 (2018).
- 634 14. C. Calabrese *et al.*, Genomic basis for RNA alterations in cancer. *Nature* **578**, 129-136  
635 (2020).
- 636 15. S.-J. Sammut *et al.*, Multi-omic machine learning predictor of breast cancer therapy  
637 response. *Nature* **601**, 623-629 (2022).
- 638 16. A. K. Krug *et al.*, Improved EGFR mutation detection using combined exosomal RNA  
639 and circulating tumor DNA in NSCLC patient plasma. *Annals of Oncology* **29**, 700-706  
640 (2018).
- 641 17. J. D. Cohen *et al.*, Detection and localization of surgically resectable cancers with a  
642 multi-analyte blood test. *Science* **359**, 926 (2018).
- 643 18. A. R. Parikh *et al.*, Liquid versus tissue biopsy for detecting acquired resistance and  
644 tumor heterogeneity in gastrointestinal cancers. *Nature Medicine* **25**, 1415-1421  
645 (2019).
- 646 19. F. Cao *et al.*, Integrated epigenetic biomarkers in circulating cell-free DNA as a robust  
647 classifier for pancreatic cancer. *Clinical Epigenetics* **12**, 112 (2020).
- 648 20. M. Ghandi *et al.*, Next-generation characterization of the Cancer Cell Line  
649 Encyclopedia. *Nature* **569**, 503-508 (2019).
- 650 21. K. Chang *et al.*, The Cancer Genome Atlas Pan-Cancer analysis project. *Nature*  
651 *Genetics* **45**, 1113-1120 (2013).
- 652 22. J. Moss *et al.*, Comprehensive human cell-type methylation atlas reveals origins of  
653 circulating cell-free DNA in health and disease. *Nature Communications* **9**, 5068 (2018).
- 654 23. J. G. Tate *et al.*, COSMIC: the Catalogue Of Somatic Mutations In Cancer. *Nucleic*  
655 *Acids Research* **47**, D941-D947 (2019).

- 656 24. E. Reznik *et al.*, Mitochondrial DNA copy number variation across human cancers.  
657 *eLife* **5**, e10769 (2016).
- 658 25. Y. Kabe *et al.*, Haem-dependent dimerization of PGRMC1/Sigma-2 receptor facilitates  
659 cancer proliferation and chemoresistance. *Nature Communications* **7**, 11030 (2016).
- 660 26. H. Wang *et al.*, ZAP-70: An Essential Kinase in T-cell Signaling. *Cold Spring Harbor*  
661 *Perspectives in Biology* **2** (2010).
- 662 27. J. Racle, K. de Jonge, P. Baumgaertner, D. E. Speiser, D. Gfeller, Simultaneous  
663 enumeration of cancer and immune cell types from bulk tumor gene expression data.  
664 *eLife* **6**, e26476 (2017).
- 665 28. A. M. Newman *et al.*, Robust enumeration of cell subsets from tissue expression  
666 profiles. *Nature Methods* **12**, 453-457 (2015).
- 667 29. A. J. Gentles *et al.*, The prognostic landscape of genes and infiltrating immune cells  
668 across human cancers. *Nature Medicine* **21**, 938-945 (2015).
- 669 30. B. Silva-Santos, K. Serre, H. Norell,  $\gamma\delta$  T cells in cancer. *Nature Reviews Immunology*  
670 **15**, 683-691 (2015).
- 671 31. D. R. Byrd, J. D. Brierley, T. P. Baker, D. C. Sullivan, D. M. Gress, Current and future  
672 cancer staging after neoadjuvant treatment for solid tumors. *CA: A Cancer Journal for*  
673 *Clinicians* **71**, 140-148 (2021).
- 674 32. Y. Yang *et al.*, Elevated tumor markers for monitoring tumor response to  
675 immunotherapy. *eClinicalMedicine* **46** (2022).
- 676 33. F. J. Sulzmaier, C. Jean, D. D. Schlaepfer, FAK in cancer: mechanistic findings and  
677 clinical applications. *Nature Reviews Cancer* **14**, 598-610 (2014).
- 678 34. Myron G. Best *et al.*, RNA-Seq of Tumor-Educated Platelets Enables Blood-Based  
679 Pan-Cancer, Multiclass, and Molecular Pathway Cancer Diagnostics. *Cancer Cell* **28**,  
680 666-676 (2015).
- 681 35. V. Thorsson *et al.*, The Immune Landscape of Cancer. *Immunity* **48**, 812-830.e814

- 682 (2018).
- 683 36. M. C. Liu *et al.*, Sensitive and specific multi-cancer detection and localization using  
684 methylation signatures in cell-free DNA. *Annals of Oncology* **31**, 745-759 (2020).
- 685 37. M. C. Liu *et al.*, Plasma cell-free DNA (cfDNA) assays for early multi-cancer detection:  
686 The circulating cell-free genome atlas (CCGA) study. *Annals of Oncology* **29**, viii14  
687 (2018).
- 688 38. M. N. Moufarrej *et al.*, Early prediction of preeclampsia in pregnancy with cell-free RNA.  
689 *Nature* **602**, 689-694 (2022).
- 690 39. M. Rasmussen *et al.*, RNA profiles reveal signatures of future health and disease in  
691 pregnancy. *Nature* **601**, 422-427 (2022).
- 692 40. R. Sadeh *et al.*, ChIP-seq of plasma cell-free nucleosomes identifies gene expression  
693 programs of the cells of origin. *Nature Biotechnology* **39**, 586-598 (2021).
- 694 41. S. Y. Shen, J. M. Burgener, S. V. Bratman, D. D. De Carvalho, Preparation of cfMeDIP-  
695 seq libraries for methylome profiling of plasma cell-free DNA. *Nature Protocols* **14**,  
696 2749-2780 (2019).
- 697 42. V. A. Schneider *et al.*, Evaluation of GRCh38 and de novo haploid genome assemblies  
698 demonstrates the enduring quality of the reference assembly. *Genome Research* **27**,  
699 849-864 (2017).
- 700 43. J. Harrow *et al.*, GENCODE: The reference human genome annotation for The  
701 ENCODE Project. *Genome Research* **22**, 1760-1774 (2012).
- 702 44. P. Glažar, P. Papavasileiou, N. Rajewsky, circBase: a database for circular RNAs. *RNA*  
703 (2014).
- 704 45. S. Griffiths-Jones, R. J. Grocock, S. van Dongen, A. Bateman, A. J. Enright, miRBase:  
705 microRNA sequences, targets and gene nomenclature. *Nucleic Acids Research* **34**,  
706 D140-D144 (2006).
- 707 46. M. K. Iyer *et al.*, The landscape of long noncoding RNAs in the human transcriptome.

- 708 *Nature Genetics* **47**, 199-208 (2015).
- 709 47. H. M. Amemiya, A. Kundaje, A. P. Boyle, The ENCODE Blacklist: Identification of  
710 Problematic Regions of the Genome. *Scientific Reports* **9**, 9354 (2019).
- 711 48. G. Zhu *et al.*, Tissue-specific cell-free DNA degradation quantifies circulating tumor  
712 DNA burden. *Nature Communications* **12**, 2229 (2021).
- 713 49. Matthew W. Snyder, M. Kircher, Andrew J. Hill, Riza M. Daza, J. Shendure, Cell-free  
714 DNA Comprises an In Vivo Nucleosome Footprint that Informs Its Tissues-Of-Origin.  
715 *Cell* **164**, 57-68 (2016).
- 716 50. P. Jiang *et al.*, Plasma DNA End-Motif Profiling as a Fragmentomic Marker in Cancer,  
717 Pregnancy, and Transplantation. *Cancer Discovery* **10**, 664 (2020).
- 718 51. S. Cristiano *et al.*, Genome-wide cell-free DNA fragmentation in patients with cancer.  
719 *Nature* **570**, 385-389 (2019).
- 720 52. C. Calabrese *et al.*, Genomic basis for RNA alterations in cancer. *Nature* **578**, 129-136  
721 (2020).
- 722 53. E. Picardi, A. M. D'Erchia, C. Lo Giudice, G. Pesole, REDportal: a comprehensive  
723 database of A-to-I RNA editing events in humans. *Nucleic Acids Research* **45**, D750-  
724 D757 (2017).
- 725 54. S. E. Castel, A. Levy-Moonshine, P. Mohammadi, E. Banks, T. Lappalainen, Tools and  
726 best practices for data processing in allelic expression analysis. *Genome Biology* **16**,  
727 195 (2015).
- 728 55. S. Singh *et al.*, The landscape of chimeric RNAs in non-diseased tissues and cells.  
729 *Nucleic Acids Research* **48**, 1764-1778 (2020).
- 730 56. M. Lee *et al.*, ChimerDB 3.0: an enhanced database for fusion genes from cancer  
731 transcriptome and literature data mining. *Nucleic Acids Research* **45**, D784-D789  
732 (2017).
- 733 57. H. Ogata *et al.*, KEGG: Kyoto Encyclopedia of Genes and Genomes. *Nucleic Acids*

- 734            *Research* **27**, 29-34 (1999).
- 735    58.    M. Paczkowska *et al.*, Integrative pathway enrichment analysis of multivariate omics  
736            data. *Nature Communications* **11**, 735 (2020).
- 737    59.    G. Su, J. H. Morris, B. Demchak, G. D. Bader, Biological Network Exploration with  
738            Cytoscape 3. *Current Protocols in Bioinformatics* **47**, 8.13.11-18.13.24 (2014).
- 739    60.    A. M. Newman *et al.*, Determining cell type abundance and expression from bulk  
740            tissues with digital cytometry. *Nature Biotechnology* **37**, 773-782 (2019).
- 741    61.    B. Li *et al.*, Cell-type deconvolution analysis identifies cancer-associated myofibroblast  
742            component as a poor prognostic factor in multiple cancer types. *Oncogene* **40**, 4686-  
743            4694 (2021).
- 744    62.    P. Jiang *et al.*, Signatures of T cell dysfunction and exclusion predict cancer  
745            immunotherapy response. *Nature Medicine* **24**, 1550-1558 (2018).
- 746

## 747 Figures and legends

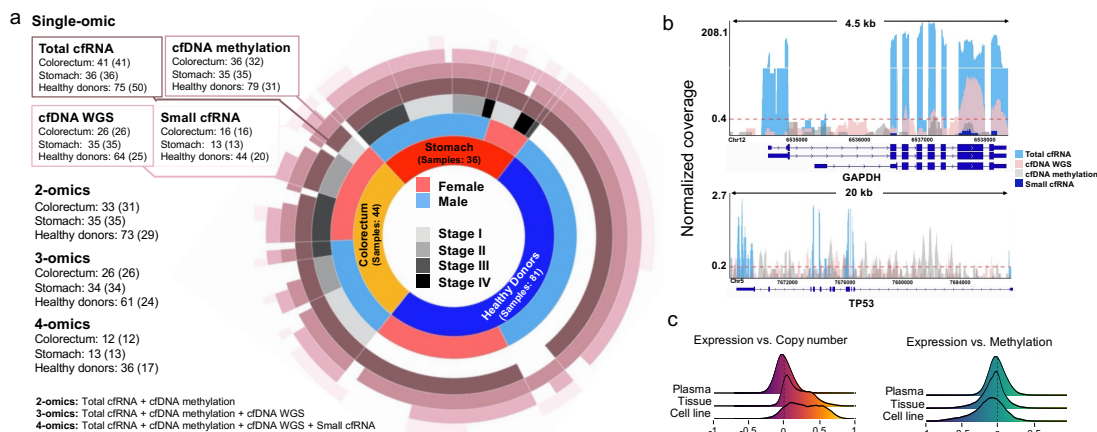

748 **Figure 1. Cell-free multi-omics data summary and quality control**

749 **a**, Cell-free multi-omics data in plasma. Numbers inside and outside brackets are datasets  
 750 and samples, respectively, where some samples were mixed for sequencing. The gap in the  
 751 ring means no paired data. **b**, Multi-omics reads mapped on a housekeeping gene, *GAPDH*,  
 752 and a tumor suppressor gene, *TP53*. The coverage is normalized by total mapped reads.  
 753 Red dashed line: the average coverage of cfDNA reads mapped on a gene. **c**, Density plots  
 754 of multi-omics correlation coefficients of genes in tissues (TCGA), cell lines (CCLE), and  
 755 plasma (this study).



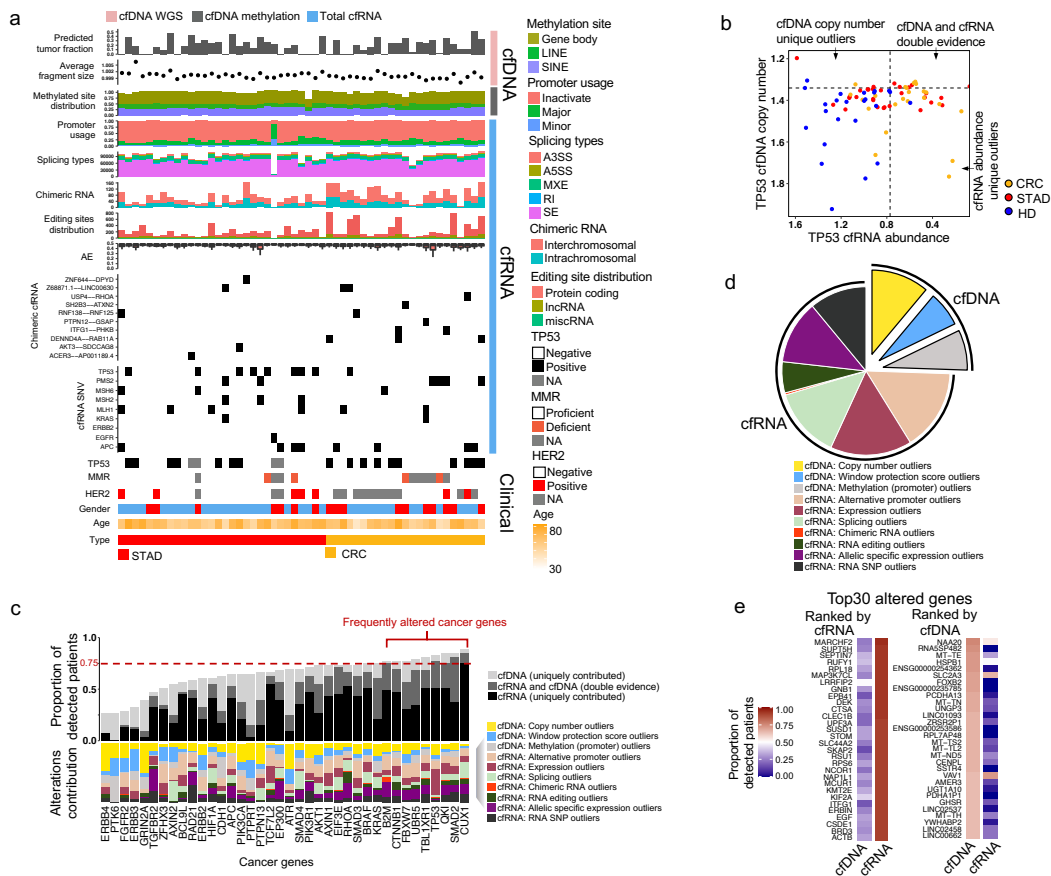

756 **Figure 2. Detection of the cancer genes using different types of variations**

757 **a**, Overview of the plasma multi-omics variation atlas. **b**, cfDNA copy number and cfrRNA

758 abundance for *TP53*. HD: healthy donor, CRC: colorectal cancer, STAD: stomach cancer.

759 The dot lines represent 95% specificity defined by HDs. **c**, Detection capacity for each cancer

760 gene combining different variations derived from cfDNA (cfWGS and cfMeDIP-seq) and total

761 cfrRNA-seq data. Frequently altered genes are defined by >75% detection ratio. **d**, Distri-

762 bution of variation types among all genes that are frequently altered. **e**, Altered genes with

763 top detection ratios ranked by cfrRNA and cfDNA, respectively.

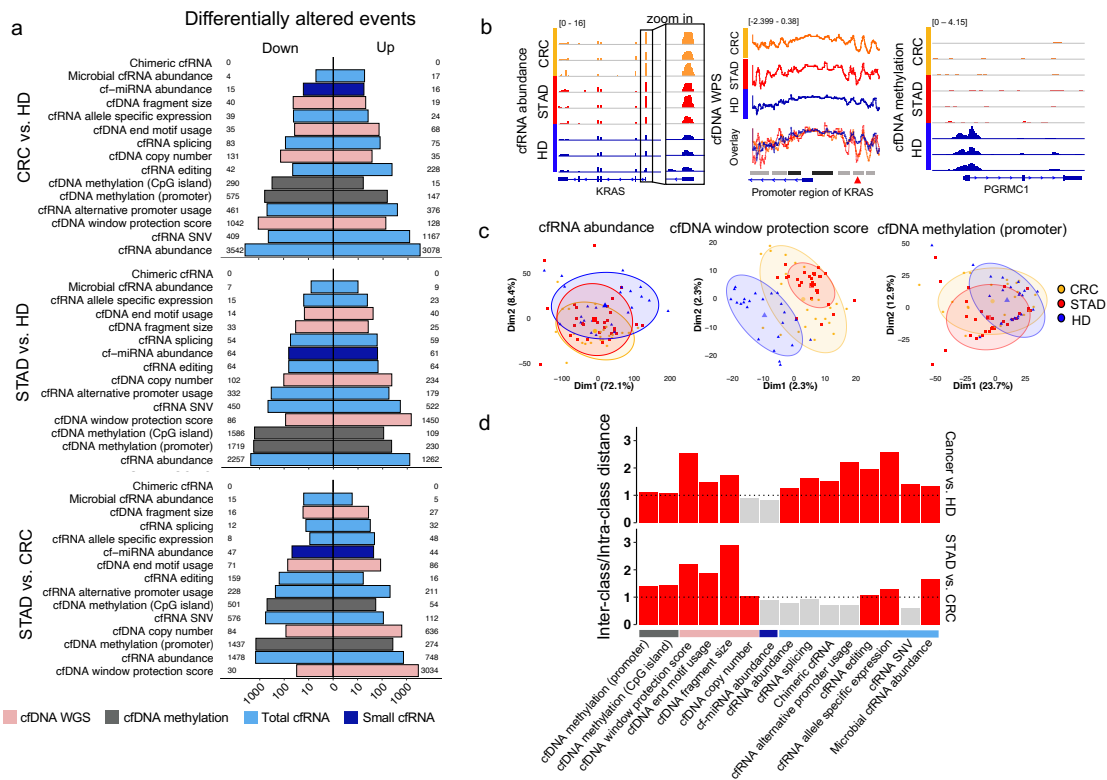

764 **Figure 3. Various cell-free molecules' differential alterations**  
 765 **a**, Numbers of the differentially altered events in plasma between cancer patients and  
 766 healthy donors (HDs), and between colorectal (CRC) and stomach cancer (STAD). **b**, Exam-  
 767 ples of *KRAS*'s cfRNA abundance, *KRAS*'s window protection score (WPS), and *PGRMC1*'s  
 768 cfDNA methylation. The blue blocks, lines and arrows below each panel are gene models.  
 769 Black blocks above promoter region of *KRAS*: promoter regions; grey blocks: enhancer re-  
 770 gions; red arrow: open regions in cancer. **c**, PCAs of 3 representative differential alterations  
 771 among cancer patients and HDs. **d**, Ratio of inter-class distance over intra-class distance for  
 772 each type of differential alteration. Ratios larger than 1 (dashed line) are colored red.

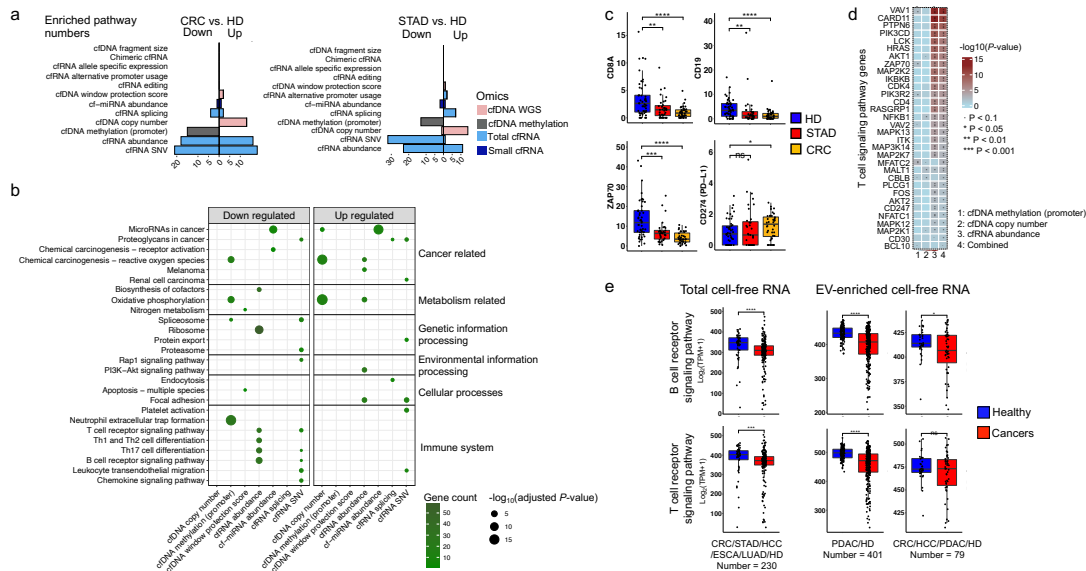

773 **Figure 4. Enriched functional pathways of the differential alterations**

774 **a**, Numbers of the enriched pathways for the differentially altered genes defined by different  
 775 variation events in cancer patients' plasma. **b**, KEGG terms of the top enriched pathways for  
 776 each differential alteration. **c**, Differential cfRNA abundance for the example genes in the im-  
 777 mune pathways. Y axis is TPM. **d**, Example genes in T cell receptor signaling pathway al-  
 778 tered at different omics levels. *P*-value represents significance of the differential alterations.  
 779 Combined *P*-value was calculated by *Activepathways*. **e**, Down-regulated T cell and B cell  
 780 receptor signaling pathways calculated by the public total and EV-enriched cfRNA-seq da-  
 781 taset. Single-tailed Wilcoxon rank-sum test was used. \**P* < 0.05, \*\**P* < 0.01, \*\*\**P* < 0.001,  
 782 \*\*\*\**P* < 0.0001, ns: not significant.

783 HD: healthy donor, CRC: colorectal cancer, ESCA: Esophageal carcinoma, HCC: hepatocel-  
 784 lular carcinoma, LUAD: lung adenocarcinoma, PDAC: pancreatic ductal adenocarcinoma,  
 785 STAD: stomach cancer.

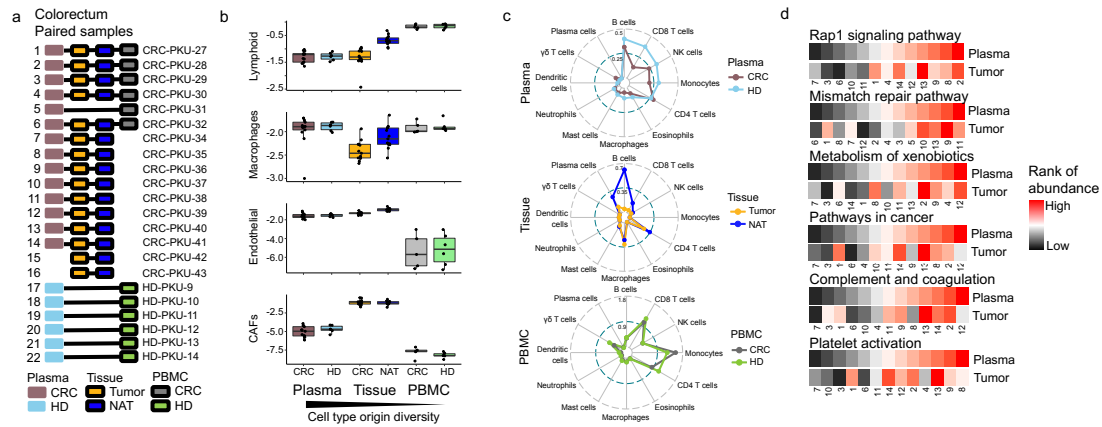

786 **Figure 5. RNA expression signals compared in plasma, PBMC, and tumor**  
 787 **a**, RNA sequencing data in the paired samples of colorectal cancer (CRC) patients. NAT:  
 788 normal tissue adjacent tumor. **b**, Inferred signals originated from different cell types for 3  
 789 types of RNA-seq data (plasma, PBMC, and tissue). Y-axis is log<sub>10</sub> transformed cell type ra-  
 790 tio estimated by EPIC. **c**, Inferred relative abundance of more cell types. **d**, Correlated path-  
 791 ways of plasma and paired tumor samples. The abundance value of a pathway was aver-  
 792 aged from the genes in this pathway. The numbers on the x-axis correspond to the sample  
 793 identifiers in **a**.

794

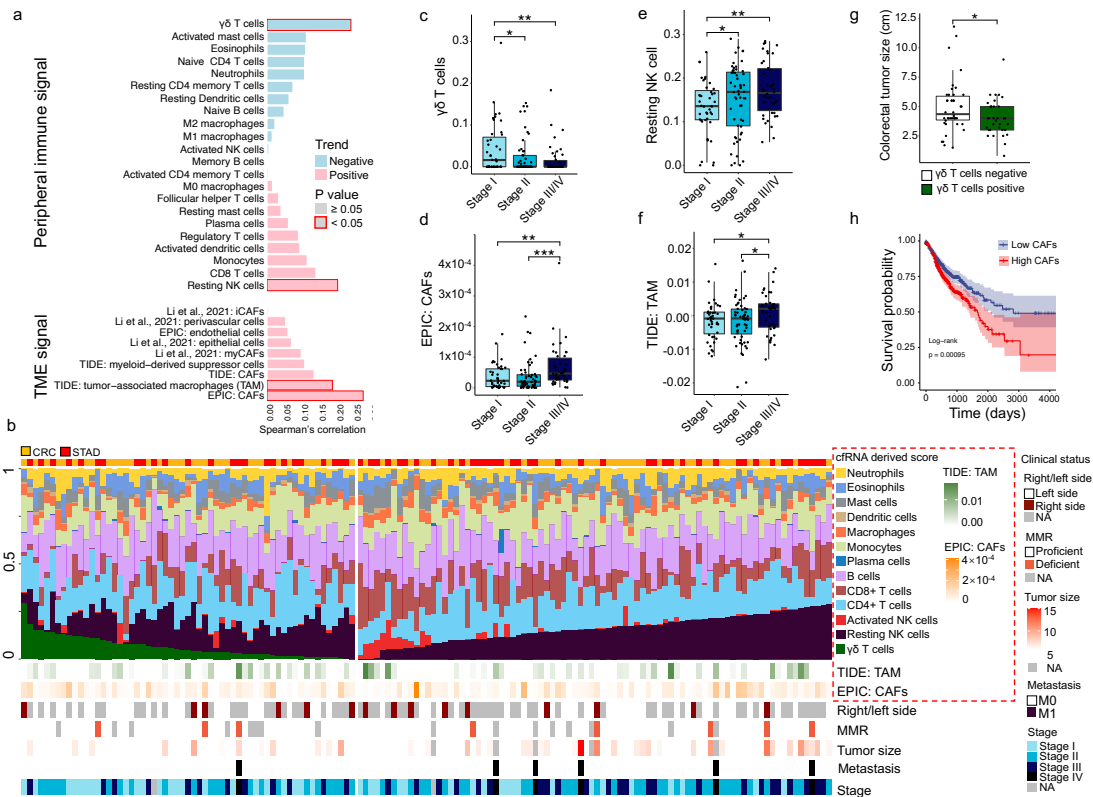

795 **Figure 6. Clinical status-informative signatures derived from the plasma cfRNAs**  
 796 **a**, Correlations between cancer stage and cfRNA-derived cell-type signatures for CRC and  
 797 STAD patients. TME: tumor microenvironment, CAF: cancer-associated fibroblast, iCAF: in-  
 798 flammatory CAF, myCAF: myofibroblastic CAF. **b**, Overview of various cfRNA-derived signa-  
 799 tures and individual clinical status, ranked by  $\gamma\delta$ -T-cell score and resting-NK-cell score. The  
 800 cfRNA-derived scores of **c**,  $\gamma\delta$  T cells, **d**, EPIC: CAFs, **e**, Resting NK T cells, and **f**, TIDE:  
 801 TAM, are shown in different cancer stages for CRC and STAD patients. **g**, Tumor sizes for 2  
 802 subtypes of CRC patients categorized by the  $\gamma\delta$ -T-cell scores (positive: >0; negative: =0) in  
 803 plasma. Single-tailed Wilcoxon rank-sum tests were used. \* $P < 0.05$ , \*\* $P < 0.01$ , \*\*\* $P <$   
 804  $0.001$ , \*\*\*\* $P < 0.0001$ . **h**, Survival with high (top 50%) and low (bottom 50%) scores of EPIC:  
 805 CAFs in the TCGA cohort of 475 COADs (colon cancer), 164 READs (rectal cancer), and  
 806 367 STADs (stomach cancer). Log-rank test was used for survival time comparison.
